# Supplementary material for: Genetic and clinical characterization of a novel FH founder mutation in families with hereditary leiomyomatosis and renal cell cancer syndrome
Source: PubMed Central journal article supplement (PMC10811853; doi:10.1186/s13023-024-03017-z), 2024-01-26

Chromosome 1  
(q42,2-q44)

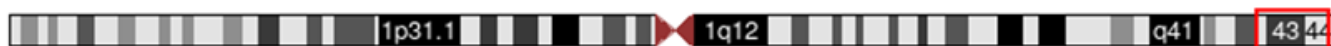

Marker  
Coordinate  
(GRCh38/hg38)

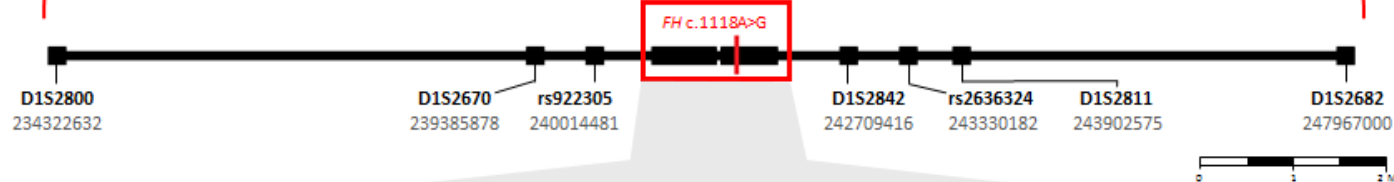

Marker  
Coordinate  
(GRCh38/hg38)

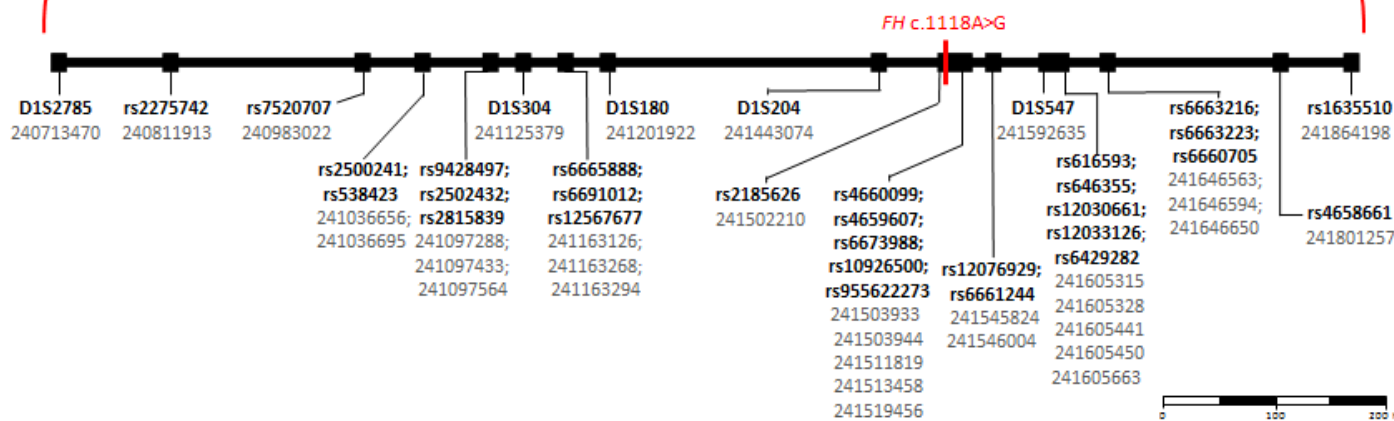

Supplement: 13023_2024_3017_MOESM1_ESM.pdf [file 13023_2024_3017_MOESM1_ESM.pdf]
